# Supplementary material
Source: HighWire-hosted journal article supplement (https://bmjopen.bmj.com/content/9/2/e024928)
Supplement: inline-supplementary-material-1 [file inline-supplementary-material-1.pdf]

## Figure Legends and Tables

**Table 1. Characteristics of reports from Medicines Australia members. Shading indicates major differences in data capture in current/ongoing versus discontinued reports.**

|                                                                               | <i>DISCONTINUED REPORTS</i>                                                                      |                                                         |                                                                                                  | ONGOING REPORTS                                                                         |                                                                                                                           |                                                                                 |
|-------------------------------------------------------------------------------|--------------------------------------------------------------------------------------------------|---------------------------------------------------------|--------------------------------------------------------------------------------------------------|-----------------------------------------------------------------------------------------|---------------------------------------------------------------------------------------------------------------------------|---------------------------------------------------------------------------------|
|                                                                               | <i>Educational Event Reports</i>                                                                 | <i>HCP Consultants Reports</i>                          | <i>Advisory Board Meeting Reports</i>                                                            | <b>Health Consumer Organisation Support Reports</b>                                     | <b>Third Party Educational Events Reports</b>                                                                             | <b>Healthcare Professionals Report</b>                                          |
| <b>DESCRIPTION</b>                                                            | <i>Payments related to educational events for HCPs that are held or sponsored by the company</i> | <i>Payments to HCPs for consultancy services/advice</i> | <i>Payments to HCPs contracted to provide advice to the company as part of an advisory board</i> | Support for not-for-profit organisations representing the interests of health consumers | Sponsorship of educational events for HCPs independently organised by a third party (e.g. hospital, medical organisation) | Payments to individual HCPs for provision of services or to engage in education |
| <b>REPORTING PERIOD</b>                                                       | <i>Oct 2011 – Sep 2015<sup>#</sup></i>                                                           | <i>Jan 2013 – Sep 2015</i>                              | <i>Jan 2013 – Sep 2015</i>                                                                       | Jan 2013 –                                                                              | Oct 2015 –                                                                                                                | Oct 2015 –                                                                      |
| <b>PAYMENTS REPORTED</b>                                                      |                                                                                                  |                                                         |                                                                                                  |                                                                                         |                                                                                                                           |                                                                                 |
| <i>Educational events for HCPs held by the company</i>                        |                                                                                                  |                                                         |                                                                                                  |                                                                                         |                                                                                                                           |                                                                                 |
| Fees to HCPs for provision of services (e.g. speaking, chairing)              | ✓                                                                                                |                                                         |                                                                                                  |                                                                                         |                                                                                                                           | ✓                                                                               |
| Sponsorship of HCP for event attendance (accommodation, travel, registration) | ✓                                                                                                |                                                         |                                                                                                  |                                                                                         |                                                                                                                           | ✓ <sup>+</sup>                                                                  |
| Sponsorship of HCP for event attendance (food, beverages)                     | ✓                                                                                                |                                                         |                                                                                                  | Payments no longer captured                                                             |                                                                                                                           |                                                                                 |
| Food and beverages at event                                                   | ✓                                                                                                |                                                         |                                                                                                  |                                                                                         |                                                                                                                           |                                                                                 |
| Event running costs (e.g. venue hire, event organiser)                        | ✓                                                                                                |                                                         |                                                                                                  |                                                                                         |                                                                                                                           |                                                                                 |

---

***Internal company meetings and consulting***

---

|                                                                         |   |                             |
|-------------------------------------------------------------------------|---|-----------------------------|
| Fees to HCPs for consulting or other services (e.g. speaking, chairing) | ✓ | ✓                           |
| Hospitality (accommodation, travel) associated with HCP services        | ✓ | ✓ <sup>+</sup>              |
| Hospitality (food, beverages) associated with HCP services              | ✓ | Payments no longer captured |

***Advisory boards***

|                                                       |   |                             |
|-------------------------------------------------------|---|-----------------------------|
| Fees to advisory board members                        | ✓ | ✓                           |
| Hospitality (accommodation, travel) for board members | ✓ | ✓ <sup>+</sup>              |
| Hospitality (food, beverages) for board members       | ✓ | Payments no longer captured |
| Food and beverages at meeting                         | ✓ |                             |
| Event running costs                                   | ✓ |                             |

***Third party (independent) meetings***

|                                                                                 |   |                             |
|---------------------------------------------------------------------------------|---|-----------------------------|
| Food and beverages at meeting                                                   | ✓ | ✓ <sup>+</sup>              |
| Event running costs                                                             | ✓ | ✓                           |
| Trade display space                                                             | ✓ | ✓                           |
| Fees to HCP for provision of services (e.g. speaking, chairing)                 | ✓ | ✓                           |
| Sponsorship of HCP for meeting attendance (accommodation, travel, registration) | ✓ | ✓ <sup>+</sup>              |
| Sponsorship of HCP for meeting                                                  | ✓ | Payments no longer captured |

|                                              |                                         |                     |                    |                                    |
|----------------------------------------------|-----------------------------------------|---------------------|--------------------|------------------------------------|
| attendance (food, beverages)                 |                                         |                     |                    |                                    |
| <i>Health consumer organisation meetings</i> |                                         |                     |                    |                                    |
| Event sponsorship                            | Enhanced transparency from January 2013 | ✓                   |                    |                                    |
| Trade display space                          |                                         | ✓                   |                    |                                    |
| Other support (e.g. publications)            |                                         | ✓                   |                    |                                    |
| <b>REPORT FORMAT</b>                         |                                         |                     |                    |                                    |
| Itemised (per event or individual)           | ✓                                       | ✓                   | ✓                  | ✓                                  |
| Aggregated (no. per period)                  | ✓                                       | ✓                   |                    | §                                  |
| Disclosure of recipient required             | Enhanced transparency from October 2015 | ✓<br>(Organisation) | ✓<br>(Third Party) | ✓<br>(Individual HCP) <sup>§</sup> |

HCP: Healthcare professional

<sup>#</sup> Reports go back to 2007, but they are not available prior to Oct 2011

<sup>†</sup>Excludes ground transfers, taxis, parking.

<sup>‡</sup> Reporting is not required if food and beverages are the company's only contribution to the event.

<sup>§</sup> Prior to the introduction of mandatory reporting of payments to HCPs on 1 October 2016, disclosure of a HCP's identifying information was contingent on the consent of the HCP. All payments received by non-consenting HCPs were reported in aggregated format.

**Table 2: Characteristics of reports from GBMA members.**

|                                                                               | DISCONTINUED                                                                                           |                                               | ONGOING                     |
|-------------------------------------------------------------------------------|--------------------------------------------------------------------------------------------------------|-----------------------------------------------|-----------------------------|
|                                                                               | Educational Event Reports                                                                              | Non-Price Benefits to Pharmacists             | NIL                         |
| <b>DESCRIPTION</b>                                                            | Payments related to educational events for HCPs <sup>1</sup> that are held or sponsored by the company | Payments and benefits provided to pharmacists |                             |
| <b>REPORTING PERIOD</b>                                                       | Apr 2010 – Jun 2015                                                                                    | Jan 2010 – Jun 2015                           | Jul 2015 –                  |
| <b>PAYMENTS REPORTED</b>                                                      |                                                                                                        |                                               |                             |
| <i>Educational events for HCPs held by the company</i>                        |                                                                                                        |                                               |                             |
| Fees to HCPs for provision of services (e.g. speaking/chairing)               | ✓                                                                                                      |                                               | Payments no longer captured |
| Sponsorship of HCP for event attendance (accommodation, travel, registration) | ✓                                                                                                      |                                               |                             |
| Sponsorship of HCP for event attendance (food/beverages)                      | ✓                                                                                                      |                                               |                             |
| Food and beverages at event                                                   | ✓                                                                                                      |                                               |                             |
| Event running costs (e.g. venue hire, event organiser)                        | ✓                                                                                                      |                                               |                             |
| <i>Non-Price Benefits to Pharmacists</i>                                      |                                                                                                        |                                               |                             |
| Access to training and education events                                       |                                                                                                        | ✓                                             | Payments no longer captured |
| Event running costs and hospitality                                           |                                                                                                        | ✓                                             |                             |
| Pharmacy aids, software and merchandising                                     |                                                                                                        | ✓                                             |                             |
| Small coupons/vouchers                                                        |                                                                                                        | ✓                                             |                             |
| <b>REPORT FORMAT</b>                                                          |                                                                                                        |                                               |                             |

|                                  |   |   |  |
|----------------------------------|---|---|--|
| Itemised (per event/individual)  | ✓ |   |  |
| Aggregated (payments per period) |   | ✓ |  |
| Disclosure of recipient required |   |   |  |

<sup>1</sup> Reports limited to prescribing HCPs and pharmacists
