# Supplementary material
Source: HighWire-hosted journal article supplement (https://bmjopen.bmj.com/content/9/2/e024928)
Supplement: inline-supplementary-material-2 [file inline-supplementary-material-2.pdf]

**Supplementary File 2: Characteristics of reports from GBMA members.**

|                                                                               | <b>DISCONTINUED</b>                                                                                    |                                               | <b>ONGOING</b>              |
|-------------------------------------------------------------------------------|--------------------------------------------------------------------------------------------------------|-----------------------------------------------|-----------------------------|
|                                                                               | <b>Educational Events</b>                                                                              | <b>Non-Price Benefits to Pharmacists</b>      | <b>NIL</b>                  |
| <b>DESCRIPTION</b>                                                            | Payments related to educational events for HCPs <sup>1</sup> that are held or sponsored by the company | Payments and benefits provided to pharmacists |                             |
| <b>REPORTING PERIOD</b>                                                       | Apr 2010 – Jun 2015                                                                                    | Jan 2010 – Jun 2015                           | Jul 2015 –                  |
| <b>PAYMENTS REPORTED</b>                                                      |                                                                                                        |                                               |                             |
| <i>Educational events for HCPs held by the company</i>                        |                                                                                                        |                                               |                             |
| Fees to individual HCPs for provision of services (e.g. speaking/chairing)    | ✓                                                                                                      |                                               | Payments no longer captured |
| Sponsorship of HCP for event attendance (accommodation, travel, registration) | ✓                                                                                                      |                                               |                             |
| Sponsorship of HCP for event attendance (food/beverages)                      | ✓                                                                                                      |                                               |                             |
| Food and beverages at event                                                   | ✓                                                                                                      |                                               |                             |
| Event running costs (e.g. venue hire, event organiser)                        | ✓                                                                                                      |                                               |                             |
| <i>Non-Price Benefits to Pharmacists</i>                                      |                                                                                                        |                                               |                             |
| Access to training and education events                                       |                                                                                                        | ✓                                             | Payments no longer captured |
| Event running costs and hospitality                                           |                                                                                                        | ✓                                             |                             |
| Pharmacy aids, software and merchandising                                     |                                                                                                        | ✓                                             |                             |
| Small coupons/vouchers                                                        |                                                                                                        | ✓                                             |                             |
| <b>REPORT FORMAT</b>                                                          |                                                                                                        |                                               |                             |

|                                  |   |   |  |
|----------------------------------|---|---|--|
| Itemised (per event/individual)  | ✓ |   |  |
| Aggregated (payments per period) |   | ✓ |  |
| Disclosure of recipient required |   |   |  |

<sup>1</sup> Reports limited to prescribing HCPs and pharmacists
